# Supplementary material
Source: HighWire-hosted journal article supplement (https://www.annfammed.org/highwire/filestream/8586/field_highwire_adjunct_files/0/Ryan_Supp_App.pdf)
Supplement: Ryan_Supp_App.pdf [file Ryan_Supp_App.pdf]

## **Supplemental materials for:**

Ryan AM, Shortell SM, Ramsay PP, Casalino LP. Salary and quality compensation for physician practices participating in accountable care organizations . *Ann Fam Med*. 2015;13(4):321-324.

## Supplemental Appendix 1. Supplemental analysis

To evaluate the sensitivity of our findings to the inclusion of practices that faced “substantial risk” for primary care costs, we re-performed our regression analysis, excluding these practices (n=36). The analysis was otherwise identical to the model described in the Methods.

Table A1 shows a similar pattern of results from the sensitivity analysis that were reported in the main analysis. ACO participation was not significantly associated with compensation for salary but remained significantly associated with compensation for quality. The sensitivity analysis also showed that substantial risk for primary care costs are even more strongly associated with compensation for salary while the relationship between ACO participation and physician compensation remained unchanged.

**Supplemental Appendix 1: Table 1.** Association between practice participation in ACOs, risk for primary care costs, and primary care physician compensation (excluding practices that accept substantial financial risk but are not ACOs)

| Independent variables                                                    | Dependent variables                                                          |                                                                               |
|--------------------------------------------------------------------------|------------------------------------------------------------------------------|-------------------------------------------------------------------------------|
|                                                                          | Percentage point change in physician compensation for <b>salary</b> (95% CI) | Percentage point change in physician compensation for <b>quality</b> (95% CI) |
| Does not participate in a CMS ACO program (ref)                          | -                                                                            | -                                                                             |
| Participates in a CMS ACO program                                        | -6.1<br>(-13.7, 1.5)                                                         | 2.2**<br>(1.1, 3.3)                                                           |
| Does not take substantial risk for primary care costs (ref) <sup>^</sup> | -                                                                            | -                                                                             |
| Takes substantial risk for primary care costs                            | 53.0**<br>(38.5, 67.5)                                                       | -0.9<br>(-6.3, 4.4)                                                           |
| Number of physicians in practice                                         | -0.02<br>(-0.07, 0.04)                                                       | -0.0005<br>(-0.005, 0.004)                                                    |
| Only primary care physicians (ref)                                       | -                                                                            | -                                                                             |
| Multispecialty practice                                                  | -7.5<br>(-25.0, 10.1)                                                        | -0.1<br>(-4.1, 3.8)                                                           |
| Practice owned by hospital or health system (ref)                        | -                                                                            | -                                                                             |
| Practice owned by physicians                                             | -9.7**<br>(-15.7, -3.7)                                                      | -8.2**<br>(-11.9, -4.9)                                                       |
| Practice owned by other group <sup>†</sup>                               | -14.3<br>(-59.6, 31.0)                                                       | -7.1*<br>(-13.9, -0.3)                                                        |
| Percentage of patients whose primary language is not English             | 0.5**<br>(0.4, 0.6)                                                          | -0.04<br>(-0.092, 0.007)                                                      |

Note: N=592

Note: Estimates are from linear regression models, incorporating the survey design.

<sup>^</sup>“Substantial risk” is defined by whether practices have some financial risk for all of their point-of-service patients

<sup>†</sup> HMO or insurance entity, non-physician managers, other

\* $p < .05$ , \*\*  $p < .01$

*This supplemental material has been supplied by the author and has not been edited for content.*
